# Supplementary material for: In situ interfacial reactions in hydride–oxide composite electrolytes for stable all-solid-state Li–metal batteries
Source: Royal Society of Chemistry journal article supplement (doi:10.1039/d4qi00491d), 2024-01-01
Supplement: d4qi00491d1.pdf [file d4qi00491d1.pdf]

Electronic Supplementary Material (ESI) for

Inorganic Chemistry Frontiers.

***In-situ* interfacial reactions in hydride–oxide composite electrolytes for stable all-solid-state Li-metal batteries**

Shunqin Zeng<sup>a,b</sup>, Meinan Zhao<sup>a</sup>, Chen Xie<sup>a</sup>, Jianhui Li<sup>a</sup>, Xiaoli Ding<sup>a,\*</sup>, Liqing He<sup>c</sup>,  
Yongtao Li<sup>a,d\*</sup>, Qingan Zhang<sup>a,d</sup>, Hai-Wen Li<sup>c\*</sup>

<sup>a</sup>School of Materials Science and Engineering & Key Laboratory of Green Fabrication and Surface Technology of Advanced Metal Materials of Ministry of Education, Anhui University of Technology, Ma'anshan, Anhui 243002, PR China

<sup>b</sup>Hunan Engineering Laboratory for preparation Technology of polyvinyl Alcohol Fiber (PVA) Material, Huaihua University, Huaihua, 418000, China

<sup>c</sup>Hefei General Machinery Research Institute, Hefei, Anhui 230031, PR China

<sup>d</sup>Key Laboratory of Efficient Conversion and Solid-state Storage of Hydrogen & Electricity of Anhui Province, Ma'anshan, Anhui 243002, China

\*Corresponding author: [dingxiaoli@ahut.edu.cn](mailto:dingxiaoli@ahut.edu.cn); [liyongtao@auht.edu.cn](mailto:liyongtao@auht.edu.cn);

[lihaiwen66@hotmail.com](mailto:lihaiwen66@hotmail.com);

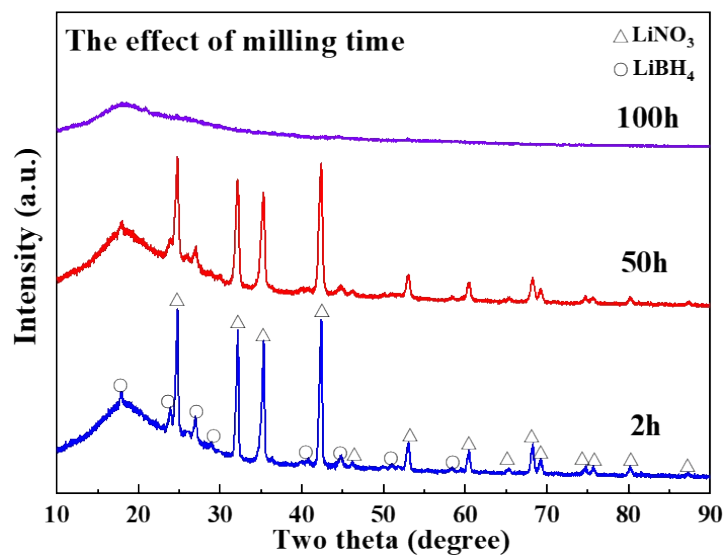

**Fig. S1.** X-ray diffraction patterns of 50 wt% LiBH<sub>4</sub>/LiNO<sub>3</sub>

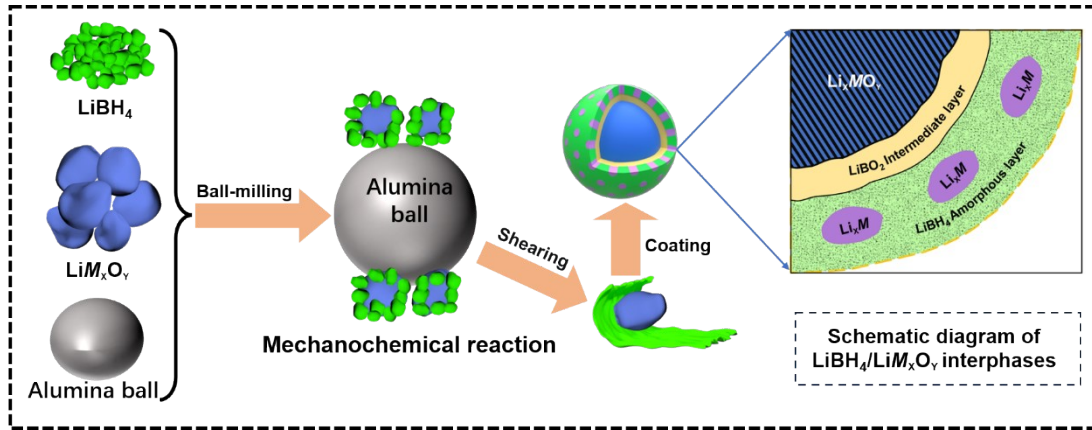

**Fig. S2.** Mechanism diagram of mechanochemical reaction formation of hydride-oxide dual core-shell

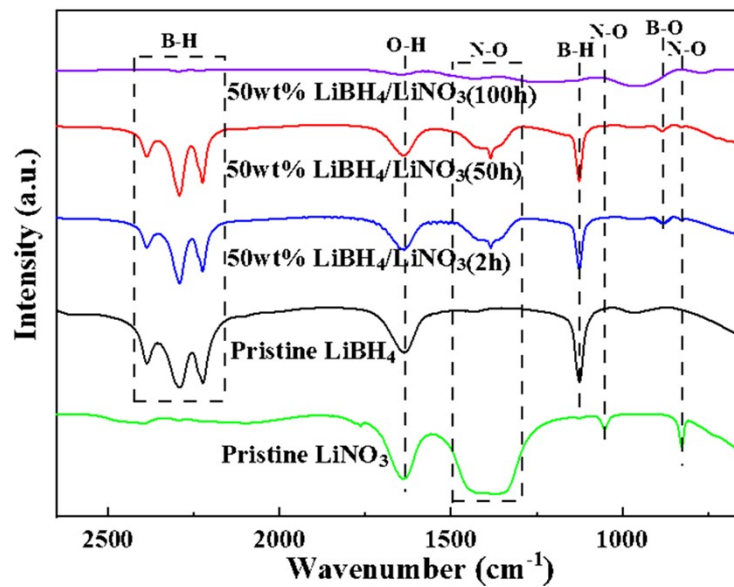

Fig. S3. FT-IR spectra of 50 wt%  $\text{LiBH}_4/\text{LiNO}_3$  with different milling time.

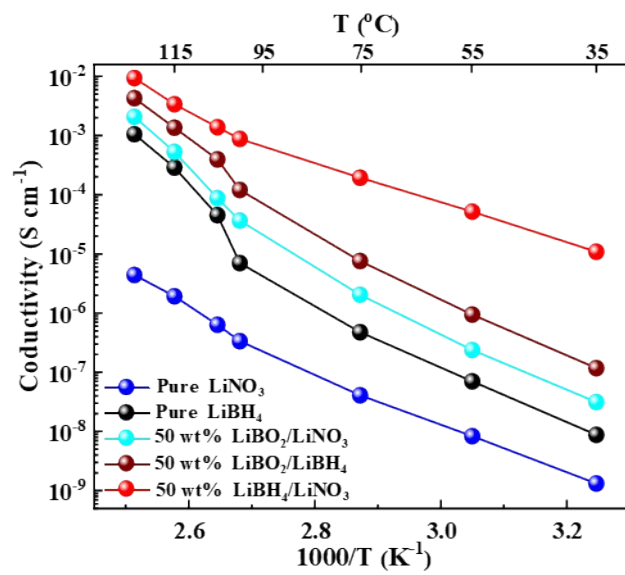

Fig. S4. Temperature-dependent ionic conductivities of composites SSEs.

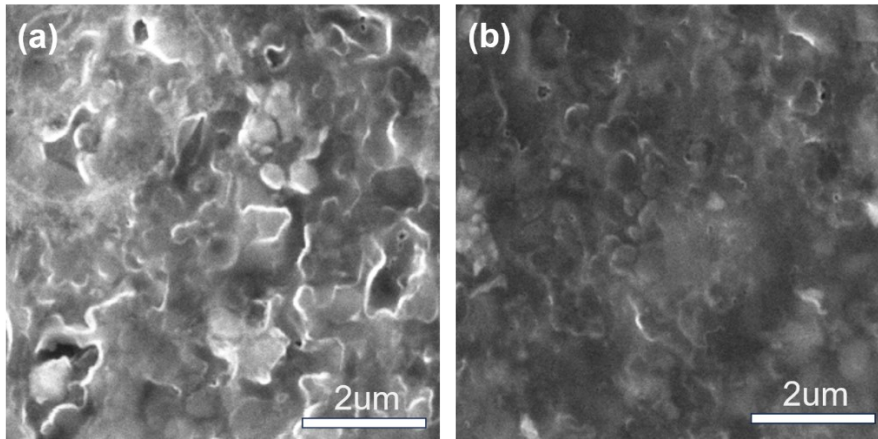

**Fig. S5.** SEM images of pellets for (a) pristine  $\text{LiNO}_3$  and (b) 50 wt%  $\text{LiBH}_4/\text{LiNO}_3$ .

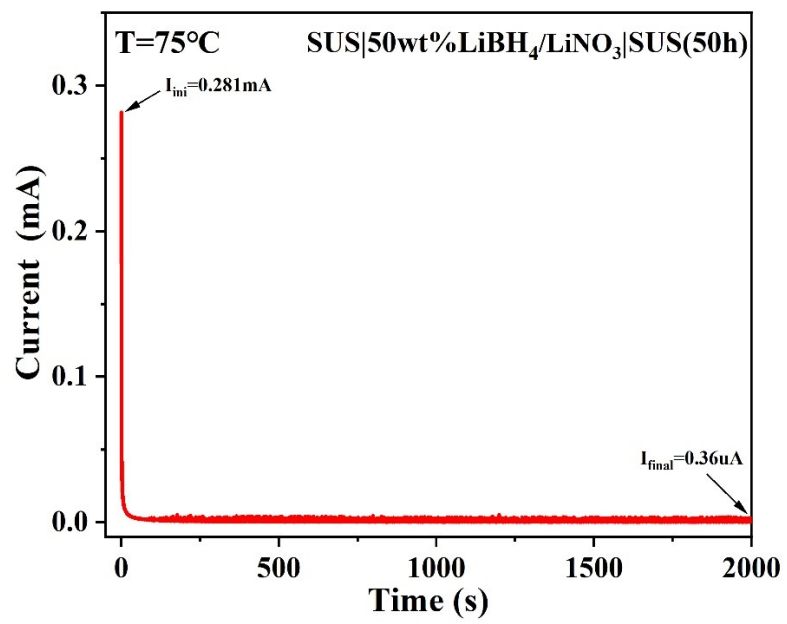

Fig. S6. Direct current (DC) polarization of 50 wt% LiBH<sub>4</sub>/LiNO<sub>3</sub>

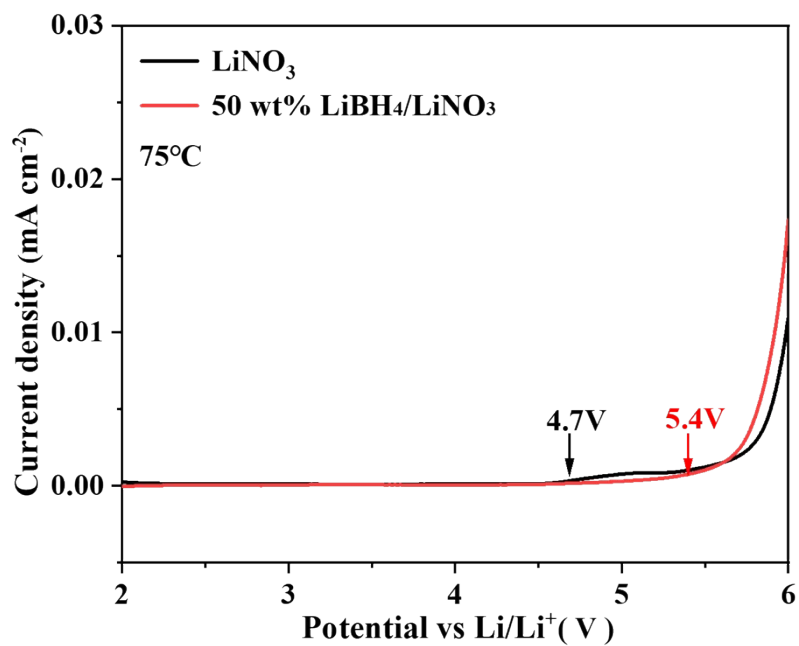

**Fig. S7.** LSV curves of LiNO<sub>3</sub> and 50 wt% LiBH<sub>4</sub>/LiNO<sub>3</sub> at a scanning rate of 0.5 mV S<sup>-1</sup> at 75 °C



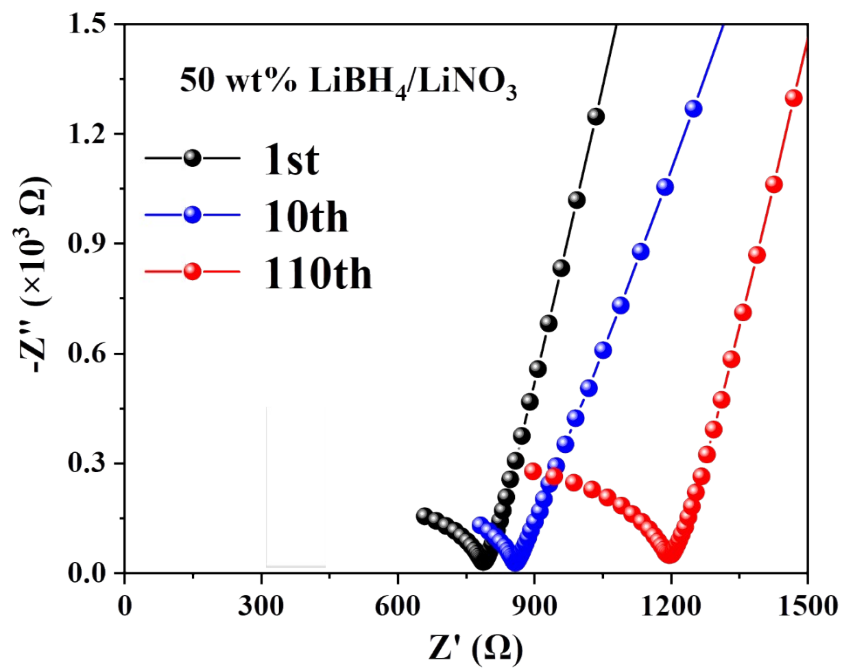

**Fig. S8.** Electrochemical impedance spectroscopy of cells after galvanostatic charge/discharge curves of 50 wt% LiBH<sub>4</sub>/LiNO<sub>3</sub> solid electrolytes measurements at 75 °C.

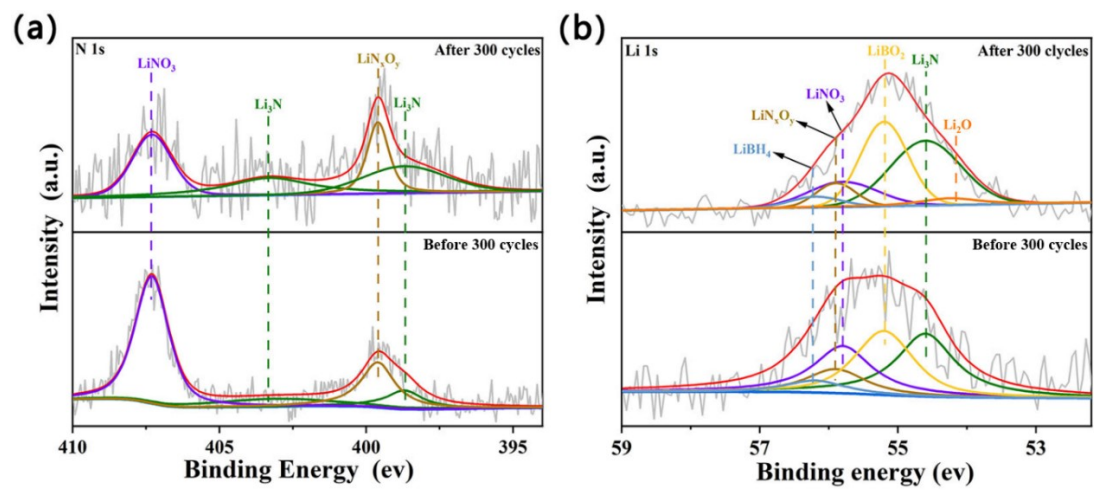

Fig. S9. XPS spectra of  $N\ 1s$  and  $Li\ 1s$  for  $LiBH_4/LiNO_3$  surface layer before and after 300 cycles.

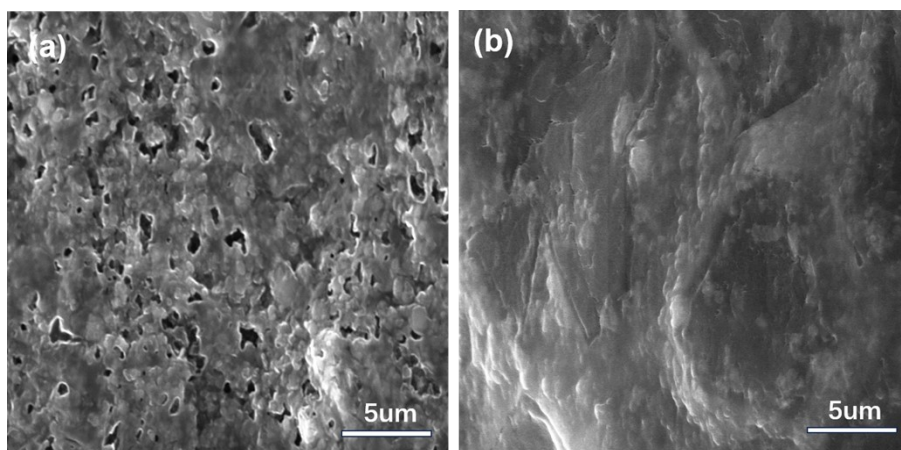

**Fig. S10.** SEM images of Li surface of (a)  $\text{LiNO}_3$  and (b) 50 wt%  $\text{LiBH}_4/\text{LiNO}_3$  in  $\text{Li}||\text{Li}$  cell after 110 cycles.

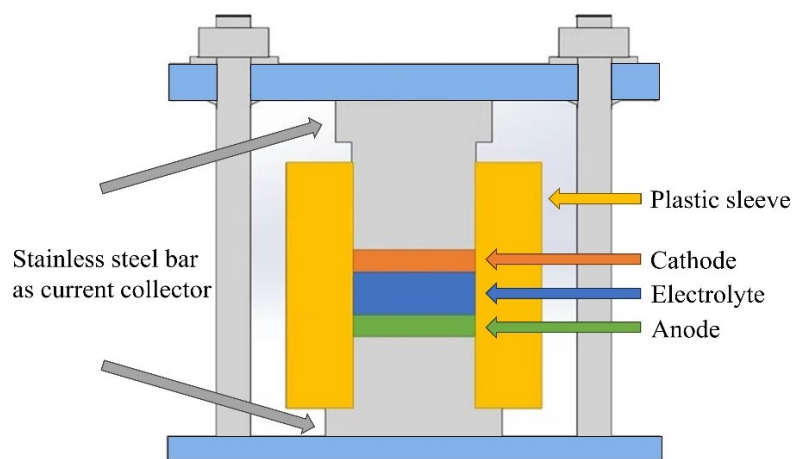

**Fig. S11.** Schematic illustration of the homemade Swagelok-type full cell.

**Supplementary Table 1.** The electrochemical properties of reported solid electrolytes and this work were compared.

| Solid electrolytes                                                                             | Electrochemical window | Critical current density    | Li  Li cycling stability                    | Ref.      |
|------------------------------------------------------------------------------------------------|------------------------|-----------------------------|---------------------------------------------|-----------|
| $\text{LiBH}_4 \cdot x\text{NH}_3\text{-Li}_2\text{O}$                                         | 0.5~3.8V               | N. A                        | 0.1mA $\text{cm}^{-2}$ for 30 h at 30 °C    | 1         |
| $\text{Li}_{6.4}\text{La}_3\text{Zr}_{1.4}\text{Ta}_{0.6}\text{O}_{12}\text{-Li}_3\text{PO}_4$ | -1~5V                  | 1.2mA $\cdot\text{cm}^{-2}$ | 0.2mA $\text{cm}^{-2}$ for 500 h at 30 °C   | 2         |
| $\text{Li}_7\text{La}_3\text{Zr}_2\text{O}_{12}\text{-LiBH}_4$                                 | 0~5V                   | 0.5mA $\cdot\text{cm}^{-2}$ | N. A                                        | 3         |
| $\text{Li}_{6.4}\text{La}_3\text{Zr}_{1.4}\text{Ta}_{0.6}\text{O}_{12}\text{-LiBH}_4$          | -1~6V                  | 0.7mA $\cdot\text{cm}^{-2}$ | 0.15mA $\text{cm}^{-2}$ for 1000 h at 60 °C | 4         |
| $\text{LiBH}_4 \cdot 1/2\text{NH}_3\text{-MgO}$                                                | -0.5~4V                | N. A                        | 0.1mA $\text{cm}^{-2}$ for 40 h at 30 °C    | 5         |
| $\text{LiBH}_4/2\text{NH}_3$                                                                   | 0.2~1.8 V              | N. A                        | N. A                                        | 6         |
| $\text{LiBH}_4/\text{LiNO}_3$                                                                  | -0.5~6V                | 2.3mA $\cdot\text{cm}^{-2}$ | 0.2mA $\text{cm}^{-2}$ for 650 h at 75 °C   | This work |

## Supplementary References

1. Zhao, W. *et al.* Li-Ion conductivity enhancement of  $\text{LiBH}_4 \cdot x\text{NH}_3$  with *in-situ* formed  $\text{Li}_2\text{O}$  nanoparticles. *ACS Appl. Mater. Interfaces* **13**, 31635–31641 (2021).
2. Bi, Z. *et al.* Molten salt driven conversion reaction enabling lithiophilic and air-stable garnet surface for solid-state lithium batteries. *Adv. Funct. Mater.* **32**, 2208751 (2022).
3. Sakamoto, Y. *et al.* Sintering-free preparation of  $\text{Li}_7\text{La}_3\text{Zr}_2\text{O}_{12}$ – $\text{LiBH}_4$ -based solid-state electrolytes and their electrical conductivities. *Electrochim. Acta* **457**, 142488 (2023).
4. Gao, Y. *et al.* Amorphous dual-layer coating: enabling high Li-ion conductivity of non-sintered garnet-type solid electrolyte. *Adv. Funct. Mater.* **39**, 2009692 (2021).
5. Zhang, R. *et al.* Size effect of MgO on the ionic conduction properties of a  $\text{LiBH}_4 \cdot 1/2\text{NH}_3$ –MgO nanocomposite. *ACS Appl. Mater. Interfaces* **14**, 8947–8954 (2022).
6. Y. G. Yan, J. B. Grinderslev, Y. S. Lee, M. Jørgensen, Y. W. Cho, and T. R. Jensen, Ammonia-assisted fast Li-ion conductivity in a new hemiammine lithium borohydride,  $\text{LiBH}_4 \cdot 1/2\text{NH}_3$ , *Chem. Commun.*, 2020, **56**, 3971
